## CORRECTION

# Correction: A new generalized family of distributions based on combining Marshal-Olkin transformation with T-X family

Hadeel Klakattawi, Dawlah Alsulami, Mervat Abd Elaal, Sanku Dey, Lamya Baharith

There are errors in the Funding section. The correct Funding statement is: This project was funded by the Deanship of Scientific Research (DSR) at King Abdulaziz University, Jeddah, under grant no. G: 1467-247-1440. The authors, therefore, acknowledge with thanks DSR for technical and financial support. The funders had no role in study design, data collection and analysis, decision to publish, or preparation of the manuscript.

## Reference

1. Klakattawi H, Alsulami D, Elaal MA, Dey S, Baharith L (2022) A new generalized family of distributions based on combining Marshal-Olkin transformation with T-X family. PLoS ONE 17(2): e0263673. <https://doi.org/10.1371/journal.pone.0263673> PMID: 35139133

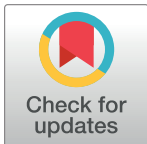

## OPEN ACCESS

**Citation:** Klakattawi H, Alsulami D, Elaal MA, Dey S, Baharith L (2023) Correction: A new generalized family of distributions based on combining Marshal-Olkin transformation with T-X family. PLoS ONE 18(10): e0293100. <https://doi.org/10.1371/journal.pone.0293100>

**Published:** October 12, 2023

**Copyright:** © 2023 Klakattawi et al. This is an open access article distributed under the terms of the [Creative Commons Attribution License](https://creativecommons.org/licenses/by/4.0/), which permits unrestricted use, distribution, and reproduction in any medium, provided the original author and source are credited.
